# Supplementary material for: Intrapericardial nonfunctional paraganglioma: a case report and literature review
Source: publisher site journal article supplement (doi:10.1515/oncologie-2023-0483), 2024-02-06
Supplement: Supplementary file 1 [file j_oncologie-2023-0483_suppl_001.docx]

**Supplementary table 1.** Published case reports of intrapericardial paraganglioma in 1987-2022.

| Author | Year | Number of Patients | Sex | Age (years) | Hypertension | Symptoms | Tumor Location | Catecholamine (increase) | Imaging Examination | | | | | Pathology | Tumor Size (cm) | Treatment |
| --- | --- | --- | --- | --- | --- | --- | --- | --- | --- | --- | --- | --- | --- | --- | --- | --- |
| US | CT | CTA | MRI | PET-CT |
| Shimoyama, Y et al. [8] | 1987 | 1 | Female | 49 | YES | Palpitation, headache, and weakness in her feet. | The root of the aorta | YES | NO | YES | NO | NO | YES | Contained cytoplasmic granules | 5.0 | Surgery (under total cardiopulmonary bypass without inducing cardiac arrest) |
| Banzo, J et al. [9] | 1991 | 1 | Male | 64 | YES | Hypertension and recurring episodes of resting substernal pain accompanied by palpitations, nausea, and sweating. | Markedly adherent to the posterior wall of the left atrium, aorta, main pulmonary artery, and circumflex artery | YES | NO | YES | NO | YES | YES | NO | 5.7 | Surgery (Intravenous phentolamine was administered intermittently) |
| Casanova, J et al. [10] | 1996 | 1 | Male | 25 | YES | Paroxysmal headache, palpitations, nausea, dizziness, perspiration and severe hypertension. | Located in the anterior surface of the heart and spreading over the pulmonary trunk. | YES | NO | YES | NO | NO | YES | The cells are reactive for neuron-specific enolase and chromogranines | 6.0 | Surgery (Under cardiopulmonary bypass) |
| Boumzebra, D. A et al. [11] | 2002 | 1 | NR | NR | NR | NO | Located in the aorta-caval groove, adherent to the roof of the left atrium and compressing the superior vena cava. | NR | NR | NR | NO | NR | NR | NR | 6.0 | Surgery (no detail) |
| Hawari, M et al. [12] | 2008 | 1 | Female | 51 | YES | Typical chest pain (increasing shortness of breath and chest tightness) | Beneath the right main pulmonary artery, anterior to the right pulmonary vein, and posterior to the distal superior vena cava (SVC). | NO | YES | YES | YES | YES | NO | Histological analysis | 4.0 | Surgery (through median sternotomy, extracorporeal circulation was instituted) |
| Lee, C. C et al. [13] | 2009 | 1 | Female | 55 | NO | Pericardial effusion | The mass abutted the basal anteriolateral wall of the left ventricle. | NO | YES | YES | YES | NO | NO | Histological analysis and Immunohistochemistry staining | 6.2 | Surgery （underwent open-heart surgery） |
| Rana, O et al. [14] | 2009 | 1 | Female | 55 | YES | Angina | Intrapericardial mass | YES | YES | YES | YES | YES | NO | Histological analysis and Immunohistochemistry staining | 4.0 | Surgery (no detai) |
| Gökalp, G et al. [15] | 2010 | 1 | Female | 70 | NO | Shortness of breath and fatigue | Intrapericardially located mass | NO | NO | YES | YES | YES | YES | Histological analysis | 6.0 | Radiotherapy |
| Pacheco Gómez, N et al. [16] | 2010 | 1 | Female | 38 | NO | Respiratory infection | At the level of the heart, above the left ventricle | NO | YES | YES | NO | YES | YES | NR | 4.0 | Surgery (no detail) |
| Tsilimparis, N et al. [7] | 2010 | 1 | Female | 78 | YES | Recurrent drop attacks without loss of consciousness. | The anterior–middle mediastinum located intrapericardially between the ascending aorta and the pulmonary artery trunk, cranial of the right ventricle. | YES | NO | YES | YES | NO | YES | Histological analysis | 5.4 | Surgery (the operation was planned on standby of a heart–lung machine.) |
| Imperatori, A et al. [17] | 2011 | 1 | Female | 34 | YES | Headache, palpitation, and flushing. | Intrapericardial mass below the left atrium roof | YES | NO | YES | NO | NO | YES | Histological analysis and Immunohistochemistry staining | 5.5 | Surgery (the tumor was approached by right thoracotomy and was resected without cardiopulmonary bypass) |
| Matsumoto, J et al. [18] | 2013 | 1 | Female | 54 | NO | NO | Tumor was located in the pericardium | NO | NO | YES | NO | NO | YES | Histological analysis | 3.5 | Surgery (under total cardiopulmonary bypass) |
| Tracy, J. C et al. [19] | 2013 | 1 | Male | 33 | YES | Dysphagia and dysarthria | Intrapericardial | YES | YES | YES | YES | YES | YES | NR | 3.7 | NR |
| Brichon, P. Y et al. [20] | 2014 | 1 | Male | 41 | NR | NR | NR | NR | NR | NR | YES | NR | NR | NR | NR | Surgery (artery was successfully occluded with microparticules and microcoils before surgery) |
| Ojiaku, M et al. [21] | 2014 | 1 | Male | 38 | YES | Night sweats, nonproductive cough, and weight loss. | A solid, well-encapsulated intrapericardial mass attached to the base of the aorta and pulmonary arterial root. | YES | YES | YES | YES | YES | NO | No detail | NR | Surgery (no detail) |
| Teodorescu, M et al. [22] | 2014 | 1 | Female | 38 | NO | NO | Above the right pulmonary artery, posterior to the ascending aorta and medial to the superior vena cava | NO | NO | YES | YES | YES | YES | NO | 4.4 | Surgery (under extracorporeal circulation) |
| Yamamoto, Y et al. [23] | 2014 | 1 | Female | 63 | NO | Dysphagia | The middle mediastinum | NO | YES | YES | YES | YES | YES | Histological analysis and Immunohistochemistry staining | 9.0 | Post-biopsy surgery (through right posterolateral thoracotomy) |
| Degrauwe, S et al. [24] | 2017 | 1 | male | 43 | NO | pituitary macroprolactinoma | pericardium | YES | YES | NO | YES | YES | NO | Histological analysis and Immunohistochemistry staining | 7.5 | Surgery (through a median sternotomy) |
| Chen, Y. Y et al. [25] | 2018 | 1 | female | 63 | YES | faint, pitting edema, abdominal fullness with ascites, and hemopericardium with impending tamponade | intra-pericardial (no detail) | YES | YES | YES | YES | NO | NO | Histological analysis and Immunohistochemistry staining | NR | Surgery (under cardiopulmonary bypass) |
| Siejka, D. A et al. [3] | 2019 | 1 | male | 34 | YES | palpitations, headache, diaphoresis, anxiety, and central chest pain | between the aortic root and pulmonary artery | YES | YES | NO | YES | YES | YES | Histological analysis and Immunohistochemistry staining | 3.5 | Surgery (under cardiopulmonary bypass) |
| Gomes de Farias, L. P et al. [26] | 2022 | 1 | male | 56 | NO | NO | surrounded by the inferior border of aortic arch, the posterior border of ascending aorta, the upper border of the right main pulmonary artery, and the anterior border of the trachea and proximal left main bronchus | NO | NO | YES | YES | NO | YES | Histological analysis | 2.6 | Surgery (no detail) |

US: ultrasound; CT: Computed Tomaggraphy; CTA: Computed Tomography Angiography; MRI: Magnetic Resonance Imaging; PET-CT: Positron Emission Tomography-Computerized Tomography; NR: No Report.
